# Supplementary material for: Copper(i)-catalyzed synthesis of 1,3-enynes via coupling between vinyl halides and alkynes or domino coupling of vinyl halides
Source: Royal Society of Chemistry journal article supplement (doi:10.1039/c1ob06210g), 2011-01-01

## Supporting Information

### **Copper(I)-Catalyzed Synthesis of 1,3-Enynes via Coupling between Vinyl Halides and Alkynes or Domino Coupling of Vinyl halides**

*Yan Zhu,<sup>a</sup> Tingyi Li<sup>a</sup>, Xiaoming Qu,<sup>a</sup> Peng Sun,<sup>a</sup> Hailong Yang,<sup>a</sup> and Jincheng  
Mao<sup>\*a</sup>*

*Key Laboratory of Organic Synthesis of Jiangsu Province,*

*College of Chemistry, Chemical Engineering and Materials Science*

*Soochow University, Suzhou 215123, P. R. China*

*(Fax: +86-512-65880089, e-mail: [jcmao@suda.edu.cn](mailto:jcmao@suda.edu.cn))*

## Experimental Section

### General Procedures

All reactions were carried out under an argon atmosphere condition. Solvents were dried and degassed by standard methods and all alkynes were purchased from Aldrich and Alfa. Various vinyl halides were prepared according to the references. Flash column chromatography was performed using silica gel (300-400 mesh). Analytical thin-layer chromatography was performed using glass plates pre-coated with 200-400 mesh silica gel impregnated with a fluorescent indicator (254 nm). NMR spectra were measured in CDCl<sub>3</sub> on a Varian Inova-400 NMR spectrometer (400 MHz or 300 MHz) with TMS as an internal reference. Products were characterized by comparison of <sup>1</sup>H NMR, <sup>13</sup>C NMR and TOF-MS data in the literatures.

**General procedure for copper-catalyzed domino coupling of (*E*)-vinyl halide:** Vinyl halide (0.8 mmol), CuI (10 mol%), and K<sub>3</sub>PO<sub>4</sub> (0.8 mmol) were added to a screw-capped test tube. The tube was then evacuated and backfilled with argon (3 cycles). DMSO (2 mL) was added by syringe at room temperature. The tube was again evacuated and backfilled with argon (3 cycles). The mixture was heated to 135 °C and stirred for 24 h. After cooling to room temperature, the mixture was diluted with water, and the combined aqueous phases were extracted three times with ethyl acetate. The organic layers were combined, dried over Na<sub>2</sub>SO<sub>4</sub>, and concentrated to yield the crude product, which was further purified by silica gel chromatography, using petroleum ether and ethyl acetate as eluent to provide the desired product.

**General procedure for copper-catalyzed coupling of vinyl halide and terminal alkynes:** A mixture of vinyl halide (0.4 mmol), alkyne (0.5 mmol), CuI (10 mol%), and K<sub>3</sub>PO<sub>4</sub> (0.8 mmol), and DMSO (2 mL) in a Schlenk tube was stirred under argon atmosphere for 24 h. After cooling to room temperature, the mixture was diluted with water, and the combined aqueous phases were extracted three times with ethyl acetate. The organic layers were combined, dried over Na<sub>2</sub>SO<sub>4</sub>, and concentrated to yield the crude product, which was further purified by silica gel chromatography, using petroleum ether and ethyl acetate as eluent to provide the desired product.

### Characterization of the corresponding products:

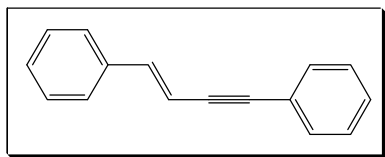

$^1\text{H}$  NMR (400 MHz,  $\text{CDCl}_3$ ) ( $\delta$ , ppm) 7.48 (d,  $J = 7.6$  Hz, 2H), 7.42 (d,  $J = 7.2$  Hz, 2H), 7.35–7.24 (m, 6H), 7.04 (d,  $J = 16.0$  Hz, 1H), 6.39 (d,  $J = 16.0$  Hz, 1H);  $^{13}\text{C}$  NMR (75 MHz,  $\text{CDCl}_3$ ) ( $\delta$ , ppm) 141.7, 136.8, 132.0, 129.2, 129.0, 128.8, 128.7, 126.8, 123.8, 108.6, 92.2, 89.4; (ESI $^+$ ): HRMS calcd. for  $[\text{C}_{16}\text{H}_{12}]^+$  requires  $m/z$  204.0939, found 204.0939.

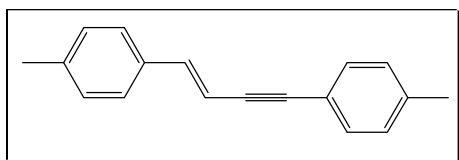

$^1\text{H}$  NMR (400 MHz,  $\text{CDCl}_3$ ) ( $\delta$ , ppm) 7.37–7.31 (m, 4H), 7.16–7.12 (m, 4H), 7.00 (d,  $J = 16.0$  Hz, 1H), 6.33 (d,  $J = 16.0$  Hz, 1H), 2.37 (s, 3H), 2.36 (s, 3H);  $^{13}\text{C}$  NMR (75 MHz,  $\text{CDCl}_3$ ) ( $\delta$ , ppm) 141.1, 138.9, 138.5, 133.9, 131.6, 129.7, 129.4, 126.5, 120.6, 107.4, 91.9, 88.7, 21.8, 21.6; HRMS calcd. for  $[\text{C}_{18}\text{H}_{16}]^+$  requires  $m/z$  232.1252, found 232.1254.

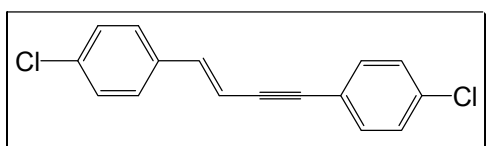

$^1\text{H}$  NMR (400 MHz,  $\text{CDCl}_3$ ) ( $\delta$ , ppm) 7.40–7.34 (m, 4H), 7.33–7.30 (m, 4H), 6.99 (d,  $J = 16.0$  Hz, 1H), 6.34 (d,  $J = 16.0$  Hz, 1H);  $^{13}\text{C}$  NMR (75 MHz,  $\text{CDCl}_3$ ) ( $\delta$ , ppm) 140.5, 134.9, 134.7, 134.6, 133.0, 129.2, 129.0, 127.7, 122.0, 108.7, 91.4, 89.8; HRMS calcd. for  $[\text{C}_{16}\text{H}_{10}\text{Cl}_2]^+$  requires  $m/z$  272.0160, found 272.0160.

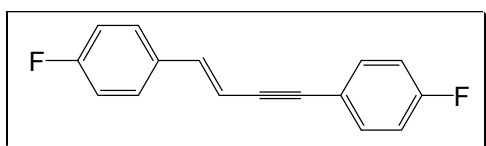

$^1\text{H}$  NMR (400 MHz,  $\text{CDCl}_3$ ) ( $\delta$ , ppm) 7.46–7.37 (m, 4H), 7.05–7.01 (m, 4H), 6.97 (s, 1H), 6.27 (d,  $J = 16.0$  Hz, 1H);  $^{13}\text{C}$  NMR (75 MHz,  $\text{CDCl}_3$ ) ( $\delta$ , ppm) 163.2 (d,  $^1J = 247.7$  Hz), 162.7 (d,  $^1J = 248.2$  Hz), 140.3, 133.6 (d,  $^3J = 8.3$  Hz), 132.7 (d,  $^4J = 3.0$  Hz), 128.2 (d,  $^3J = 8.0$  Hz), 119.6 (d,  $^4J = 3.2$  Hz), 116.0 (d,  $^2J = 21.7$  Hz), 115.9 (d,  $^2J = 22.0$  Hz), 107.9, 90.8, 88.6; HRMS calcd. for  $[\text{C}_{16}\text{H}_{10}\text{F}_2]^+$  requires  $m/z$  240.0751, found 240.0751.

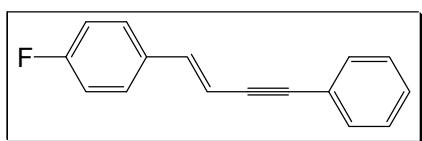

$^1\text{H}$  NMR (400 MHz,  $\text{CDCl}_3$ ) ( $\delta$ , ppm) 7.48–7.46 (m, 2H), 7.41–7.38 (m, 2H), 7.35–7.32 (m, 3H), 7.06–6.98 (m, 3H), 6.30 (d,  $J = 16.4$  Hz, 1H);  $^{13}\text{C}$  NMR (75 MHz,  $\text{CDCl}_3$ ) ( $\delta$ , ppm) 163.1 (d,  $^1J = 247.7$  Hz), 140.2, 132.8 (d,  $^4J = 2.9$  Hz), 131.7, 128.6, 128.5, 128.2 (d,  $^3J = 8.0$  Hz), 123.5, 116.0 (d,  $^2J = 21.8$  Hz), 108.1, 92.0, 88.9; HRMS calcd. for  $[\text{C}_{16}\text{H}_{11}\text{F}]^+$  requires  $m/z$  222.0845, found 222.0844.

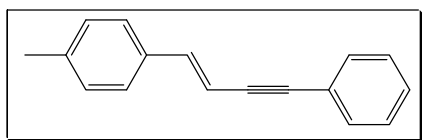

$^1\text{H}$  NMR (300 MHz,  $\text{CDCl}_3$ ) ( $\delta$ , ppm) 7.47 (t,  $J = 2.7$  Hz, 2H), 7.32 (d,  $J = 6.3$  Hz, 5H), 7.15 (d,  $J = 7.8$  Hz, 2H), 7.02 (d,  $J = 16.2$  Hz, 1H), 6.33 (d,  $J = 16.2$  Hz, 1H), 2.35 (s, 3H);  $^{13}\text{C}$  NMR (100 MHz,  $\text{CDCl}_3$ ) ( $\delta$ , ppm) 141.7, 139.2, 134.0, 131.9, 129.9, 128.8, 128.6, 126.7, 123.9, 107.4, 91.8, 89.6, 21.8; HRMS calcd. for  $[\text{C}_{17}\text{H}_{14}]^+$  requires  $m/z$  217.1096, found 217.1061.

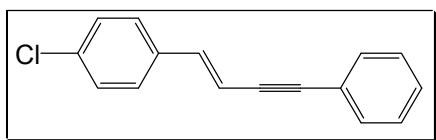

$^1\text{H}$  NMR (300 MHz,  $\text{CDCl}_3$ ) ( $\delta$ , ppm) 7.49–7.46 (m, 2H), 7.41–7.25 (m, 7H), 6.98 (d,  $J = 16.2$  Hz, 1H), 6.35 (d,  $J = 16.2$  Hz, 1H);  $^{13}\text{C}$  NMR (100 MHz,  $\text{CDCl}_3$ ) ( $\delta$ , ppm) 140.3, 135.2, 134.7, 132.0, 129.4, 128.9, 128.8, 127.9, 123.7, 109.2, 92.8, 89.0; HRMS calcd. for  $[\text{C}_{16}\text{H}_{11}\text{Cl}]^+$  requires  $m/z$  238.0549, found 238.0548.

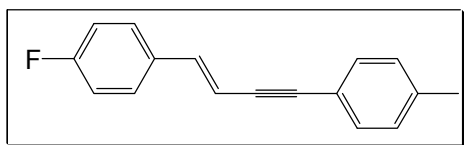

$^1\text{H}$  NMR (300 MHz,  $\text{CDCl}_3$ ) ( $\delta$ , ppm) 7.37 (d,  $J = 6.0$  Hz, 4H), 7.14 (d,  $J = 7.5$  Hz, 2H), 7.05–6.95 (m, 3H), 6.28 (d,  $J = 16.2$  Hz, 1H), 2.36 (s, 3H);  $^{13}\text{C}$  NMR (100 MHz,  $\text{CDCl}_3$ ) ( $\delta$ , ppm) 163.3 (d,  $^1J = 247.2$  Hz), 140.0, 138.9, 133.1, 131.8, 129.6, 128.3 (d,  $^3J = 6.0$  Hz), 120.6, 116.2 (d,  $^2J = 21.6$  Hz), 108.5, 92.4, 88.5, 22.0; HRMS calcd. for  $[\text{C}_{17}\text{H}_{13}\text{F}]^+$  requires  $m/z$  236.1001, found 236.1001.

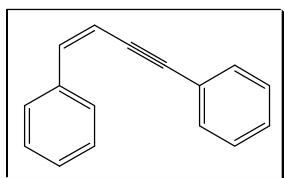

$^1\text{H}$  NMR (300 MHz,  $\text{CDCl}_3$ ) ( $\delta$ , ppm) 7.932 (d,  $J = 7.3$  Hz, 2H), 7.51–7.48 (m, 2H), 7.41 (d,  $J = 6.9$  Hz, 1H), 7.37–7.31 (m, 5H), 6.71 (d,  $J = 11.7$  Hz, 1H), 5.93 (d,  $J = 11.7$  Hz, 1H);  $^{13}\text{C}$  NMR (100 MHz,  $\text{CDCl}_3$ ) ( $\delta$ , ppm) 139.1, 137.0, 131.9, 129.2, 129.0, 128.9, 128.8, 126.8, 123.9, 107.8, 96.3, 88.7; HRMS calcd. for  $[\text{C}_{16}\text{H}_{12}]^+$  requires  $m/z$  205.0973, found 205.0981.

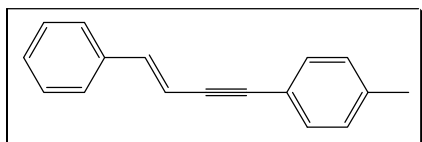

$^1\text{H}$  NMR (300 MHz,  $\text{CDCl}_3$ ) ( $\delta$ , ppm) 7.43–7.24 (m, 7H), 7.13 (d,  $J = 7.5$  Hz, 2H), 7.02 (d,  $J = 16.2$  Hz, 1H), 6.38 (d,  $J = 16.2$  Hz, 1H), 2.35 (s, 3H);  $^{13}\text{C}$  NMR (100 MHz,  $\text{CDCl}_3$ ) ( $\delta$ , ppm) 141.3, 138.8, 136.8, 131.9, 129.6, 129.2, 129.0, 126.7, 120.7, 108.7, 92.5, 88.7, 22.0; HRMS calcd. for  $[\text{C}_{17}\text{H}_{14}]^+$  requires  $m/z$  218.1096, found 218.1096.

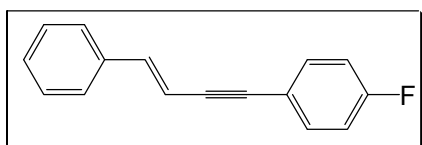

$^1\text{H}$  NMR (300 MHz,  $\text{CDCl}_3$ ) ( $\delta$ , ppm) 7.46–7.40 (m, 4H), 7.36–7.28 (m, 3H), 7.05 (d,

$J = 3.6$  Hz, 1H), 7.00 (t,  $J = 8.7$  Hz, 2H), 6.35 (d,  $J = 16.2$  Hz, 1H);  $^{13}\text{C}$  NMR (100 MHz,  $\text{CDCl}_3$ ) ( $\delta$ , ppm) 163.0 (d,  $^1J = 248.2$  Hz), 141.9, 136.8, 134.0 (d,  $^3J = 8.2$  Hz), 129.3, 129.2, 126.9, 120.1 (d,  $^4J = 3.3$  Hz), 116.2 (d,  $^2J = 22.0$  Hz), 108.5, 91.2, 89.2; HRMS calcd. for  $[\text{C}_{16}\text{H}_{11}\text{F}]^+$  requires  $m/z$  222.0845, found 222.0844.

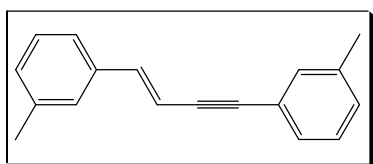

$^1\text{H}$  NMR (300 MHz,  $\text{CDCl}_3$ ) ( $\delta$ , ppm) 7.29 (d,  $J = 8.7$  Hz, 2H), 7.20 (t,  $J = 4.2$  Hz, 4H), 7.12 (d,  $J = 7.5$  Hz, 2H), 7.00 (d,  $J = 16.2$  Hz, 1H), 6.35 (d,  $J = 16.2$  Hz, 1H), 2.35 (s, 3H), 2.33 (s, 3H);  $^{13}\text{C}$  NMR (100 MHz,  $\text{CDCl}_3$ ) ( $\delta$ , ppm) 141.9, 138.9, 138.6, 136.9, 132.7, 130.0, 129.7, 129.2, 129.2, 128.8, 127.6, 124.0, 123.8, 108.5, 92.4, 89.3, 22.0, 21.8; HRMS calcd. for  $[\text{C}_{18}\text{H}_{16}]^+$  requires  $m/z$  232.1252, found 232.1254.

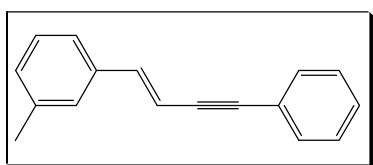

$^1\text{H}$  NMR (300 MHz,  $\text{CDCl}_3$ ) ( $\delta$ , ppm) 7.48 (t,  $J = 3.3$  Hz, 2H), 7.32 (d,  $J = 4.8$  Hz, 3H), 7.23 (d,  $J = 3.3$  Hz, 3H), 7.11 (s, 1H), 7.00 (d,  $J = 16.2$  Hz, 1H), 6.37 (d,  $J = 16.2$  Hz, 1H), 2.36 (s, 3H);  $^{13}\text{C}$  NMR (100 MHz,  $\text{CDCl}_3$ ) ( $\delta$ , ppm) 142.0, 138.9, 136.8, 132.1, 130.1, 129.7, 129.2, 128.9, 128.7, 127.6, 124.1, 108.4, 92.2, 89.6, 22.0; HRMS calcd. for  $[\text{C}_{17}\text{H}_{14}]^+$  requires  $m/z$  218.1096, found 218.1095.

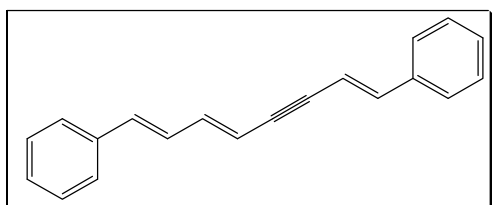

$^1\text{H}$  NMR (300 MHz,  $\text{CDCl}_3$ ) ( $\delta$ , ppm) 7.41 (t,  $J = 5.7$  Hz, 4H), 7.33 (t,  $J = 6.6$  Hz, 4H), 7.26 (d,  $J = 7.5$  Hz, 2H), 6.96 (d,  $J = 16.2$  Hz, 1H), 6.85 (d,  $J = 13.8$  Hz, 1H), 6.76 (d,  $J = 10.8$  Hz, 1H), 6.64 (d,  $J = 14.4$  Hz, 1H), 6.34 (dd,  $J = 16.2$  Hz, 1H), 5.90 (d,  $J =$

12.9 Hz, 1H);  $^{13}\text{C}$  NMR (100 MHz,  $\text{CDCl}_3$ ) ( $\delta$ , ppm) 142.4, 141.6, 137.3, 136.9, 135.3, 129.3, 129.3, 129.2, 128.8, 128.7, 127.2, 126.9, 112.1, 108.9, 93.4, 92.6; HRMS calcd. for  $[\text{C}_{20}\text{H}_{16}]^+$  requires  $m/z$  256.1252, found 256.1251.

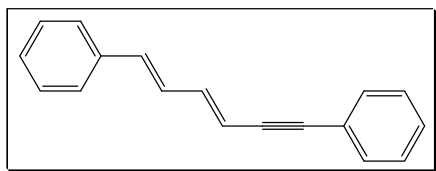

$^1\text{H}$  NMR (300 MHz,  $\text{CDCl}_3$ ) ( $\delta$ , ppm) 7.45 (t,  $J = 7.2$  Hz, 4H), 7.36–7.28 (m, 6H), 6.89–6.84 (m, 2H), 6.65 (d,  $J = 14.7$  Hz, 1H), 5.95 (d,  $J = 13.8$  Hz, 1H);  $^{13}\text{C}$  NMR (100 MHz,  $\text{CDCl}_3$ ) ( $\delta$ , ppm) 142.5, 137.3, 135.3, 132.0, 129.3, 128.9, 128.7, 128.7, 127.2, 126.9, 124.0, 111.9, 93.5, 90.0; HRMS calcd. for  $[\text{C}_{18}\text{H}_{14}]^+$  requires  $m/z$  230.1096, found 230.1094.

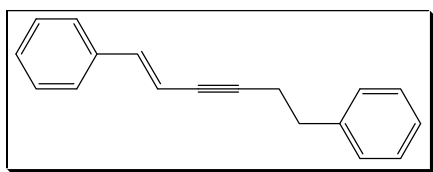

$^1\text{H}$  NMR (300 MHz,  $\text{CDCl}_3$ ) ( $\delta$ , ppm) 7.48–7.41 (m, 2H), 7.33 (t,  $J = 3.0$  Hz, 3H), 7.31 (d,  $J = 2.4$  Hz, 2H), 7.22 (d,  $J = 6.3$  Hz, 2H), 7.05 (d,  $J = 16.2$  Hz, 1H), 6.38 (d,  $J = 16.2$  Hz, 1H), 2.85 (t,  $J = 7.5$  Hz, 2H), 2.51–2.45 (m, 2H);  $^{13}\text{C}$  NMR (100 MHz,  $\text{CDCl}_3$ ) ( $\delta$ , ppm) 141.9, 132.1, 130.5, 129.3, 129.2, 129.0, 128.9, 127.0, 126.9, 108.7, 92.3, 89.5, 69.5, 35.4; HRMS calcd. for  $[\text{C}_{18}\text{H}_{16}]^+$  requires  $m/z$  232.1252, found 232.1252.

### Copy of HRMS and NMR Spectra for desired products:

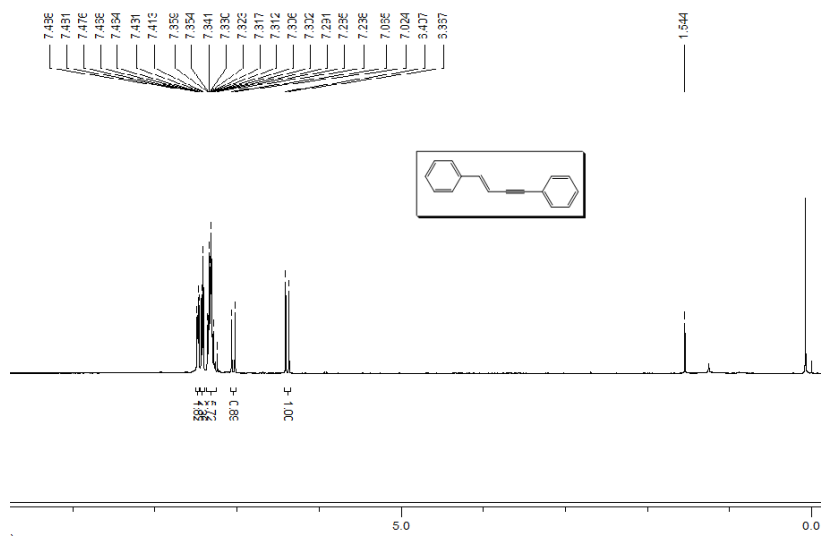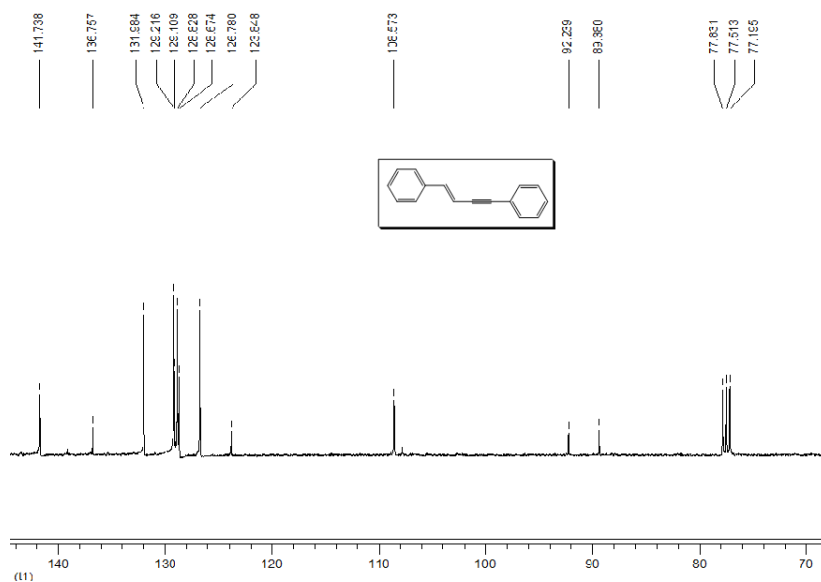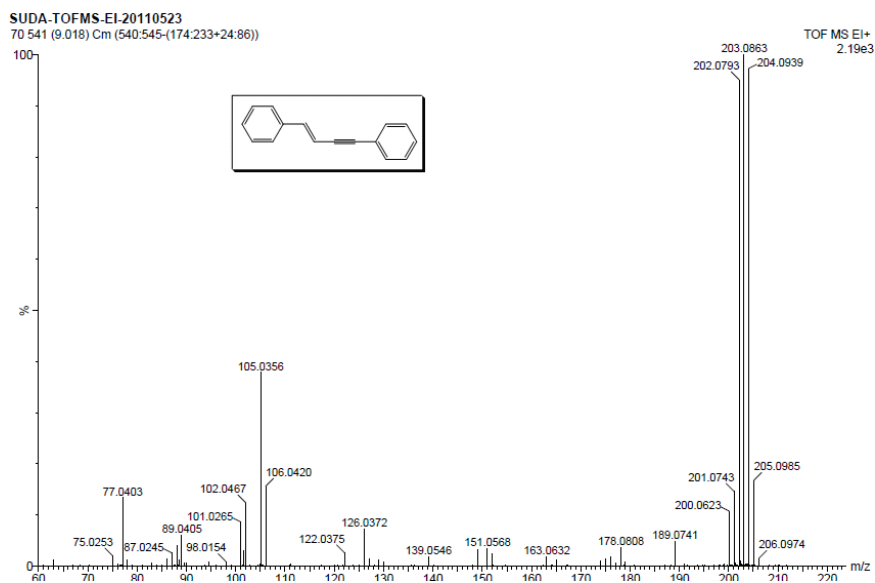



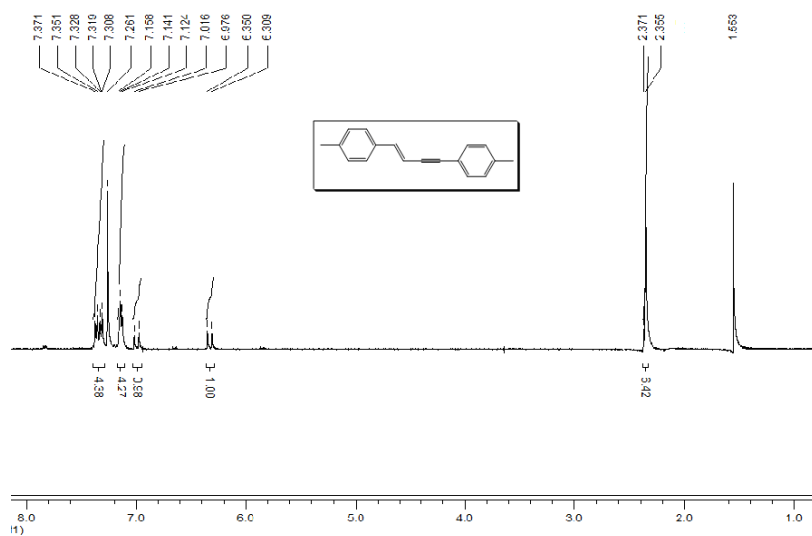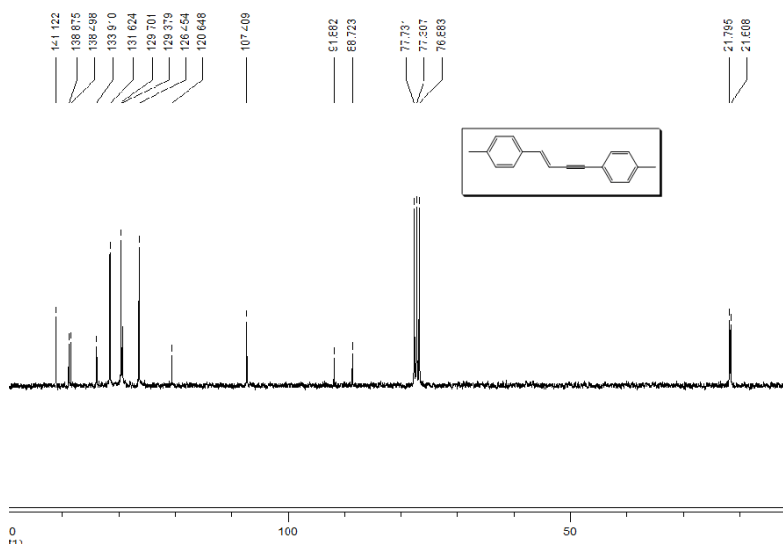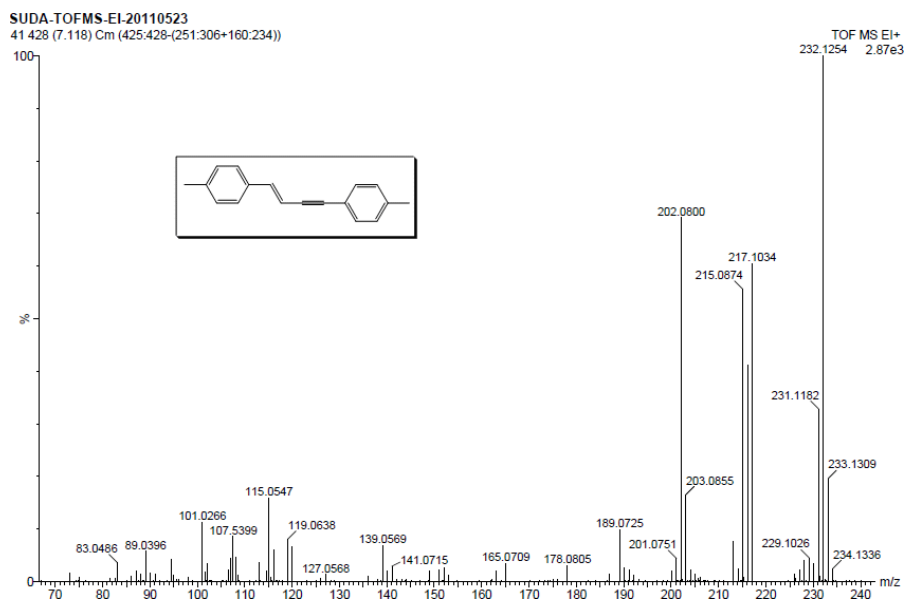

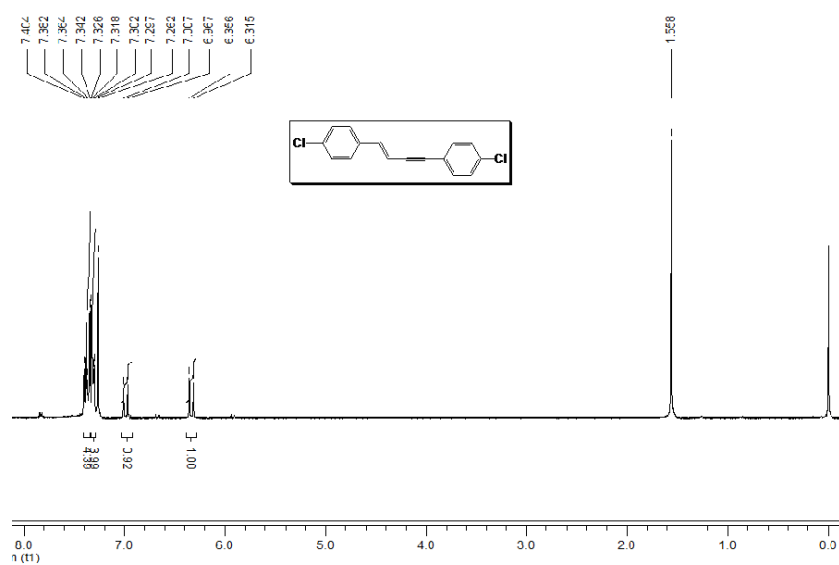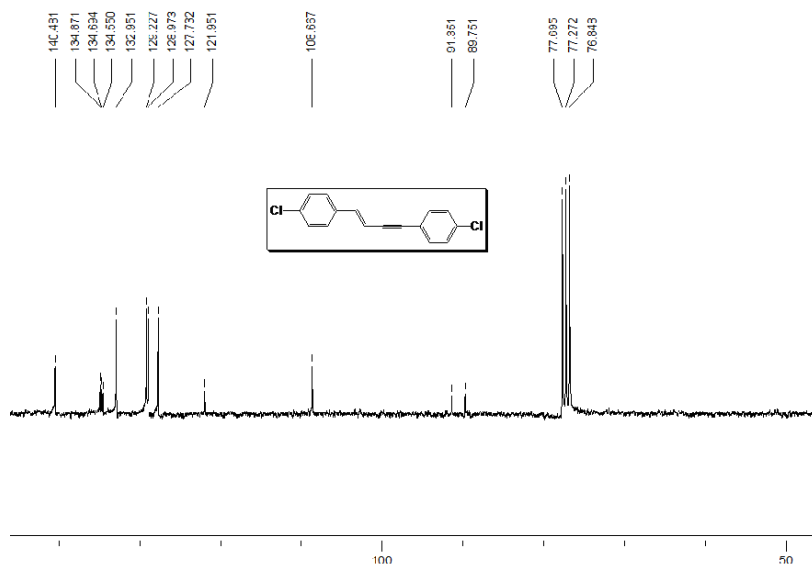

SUDA-TOFMS-EI-20110523  
42.472 (7.867) Cm (460.472-(266.338+248.299))

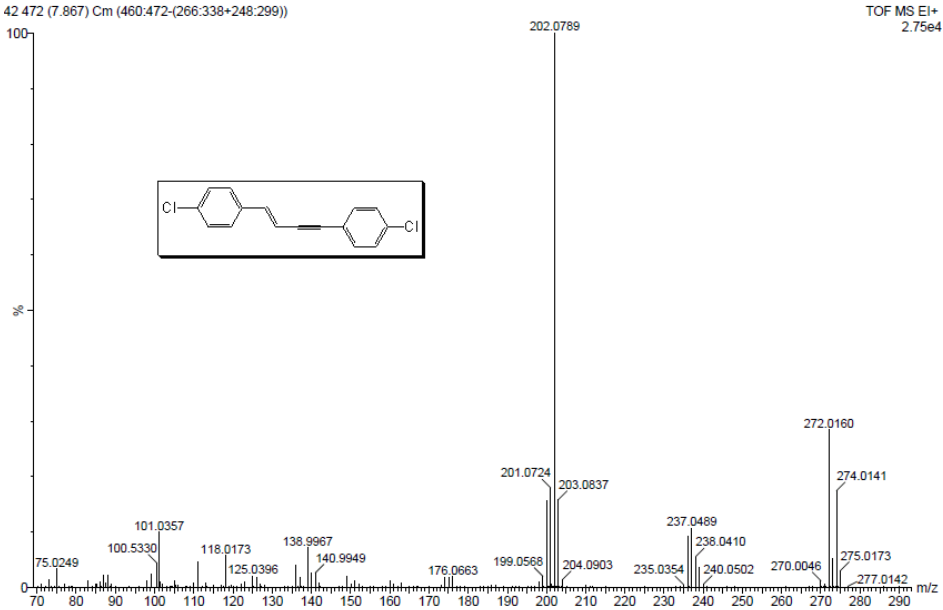

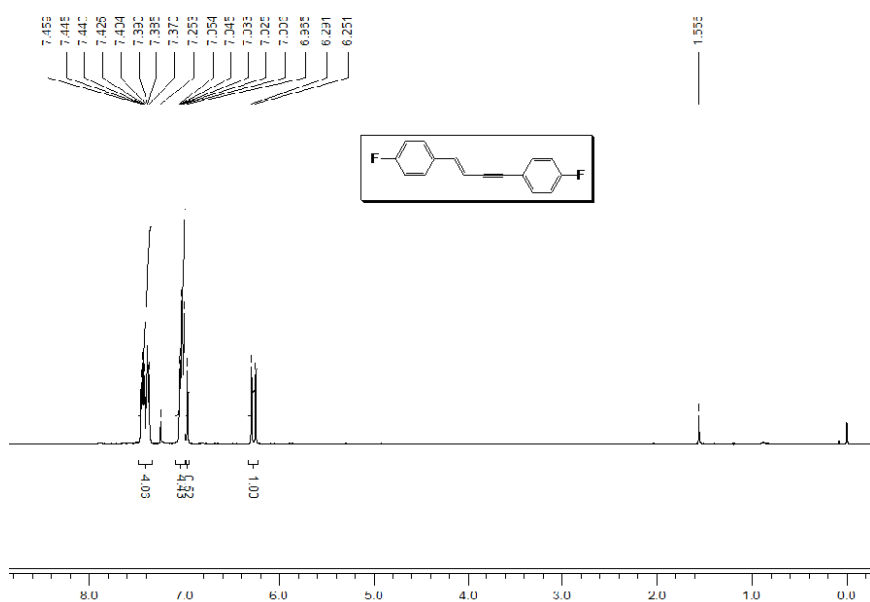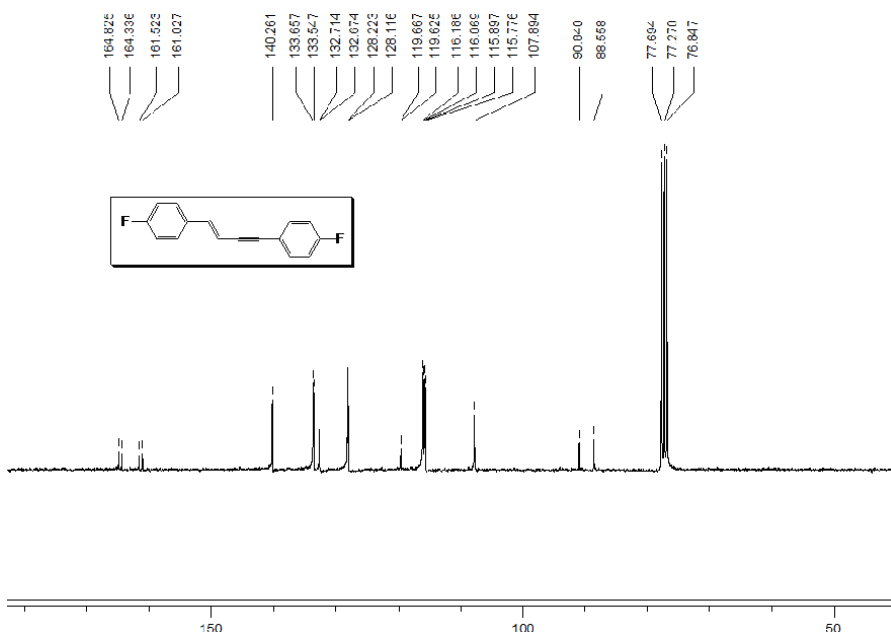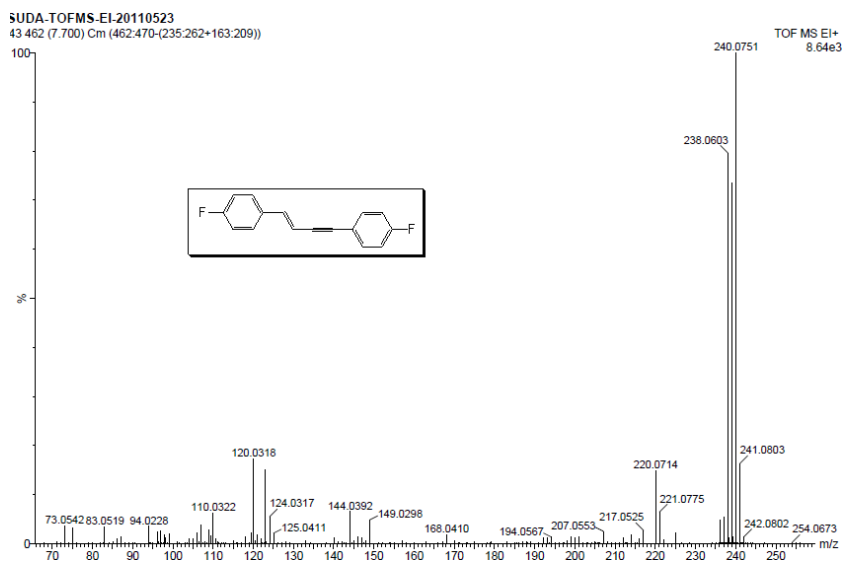

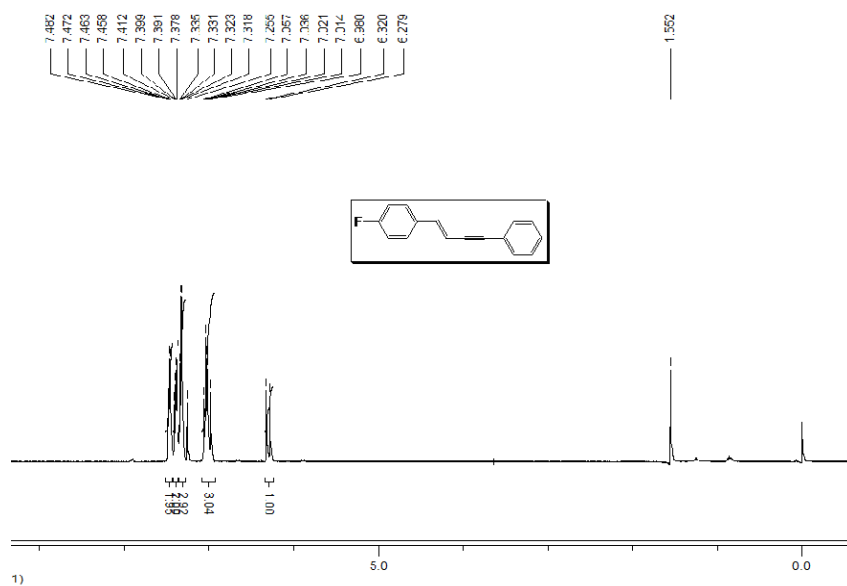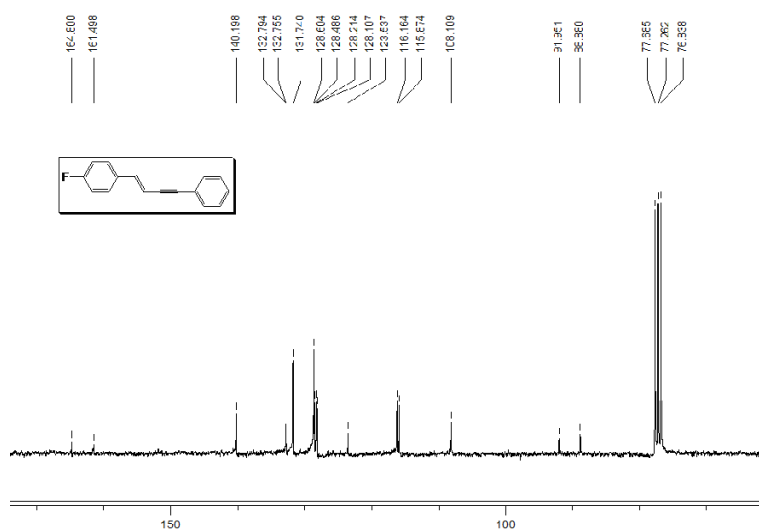

SUDA-TOFMS-EI-20110523  
 50 1107 (18.451) Cm (1104:1108-(671:761+420:549))

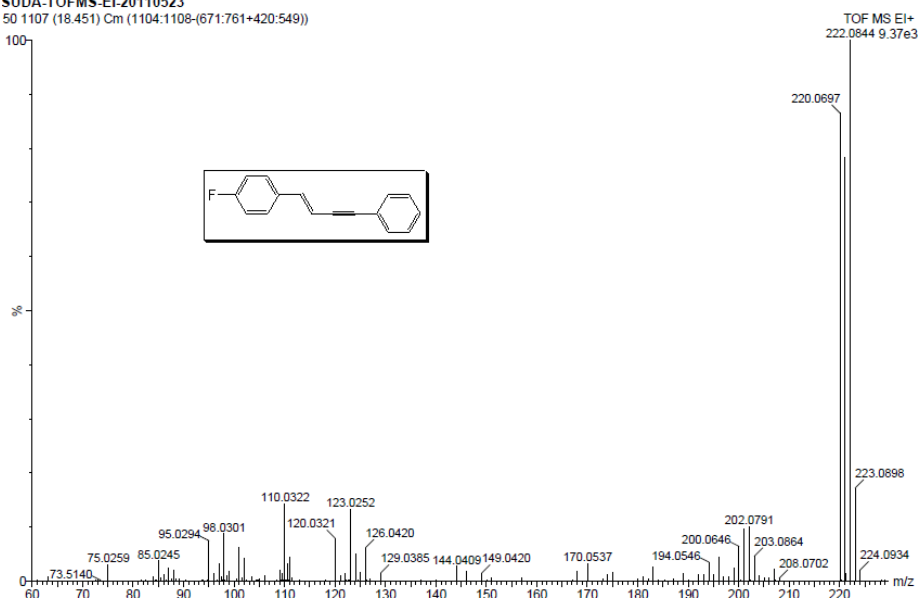

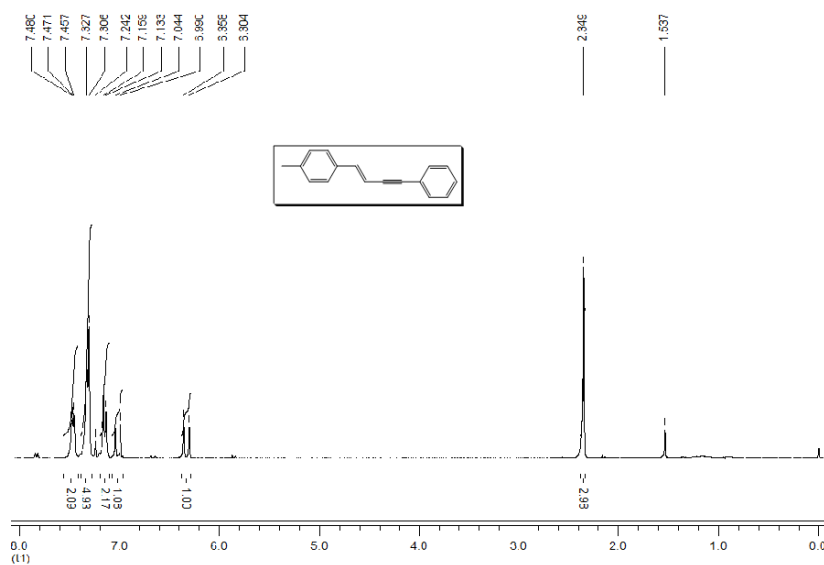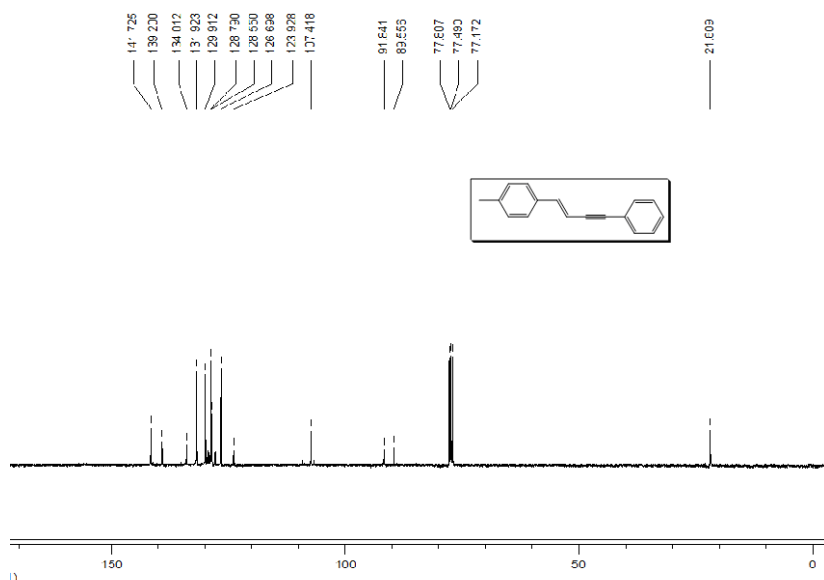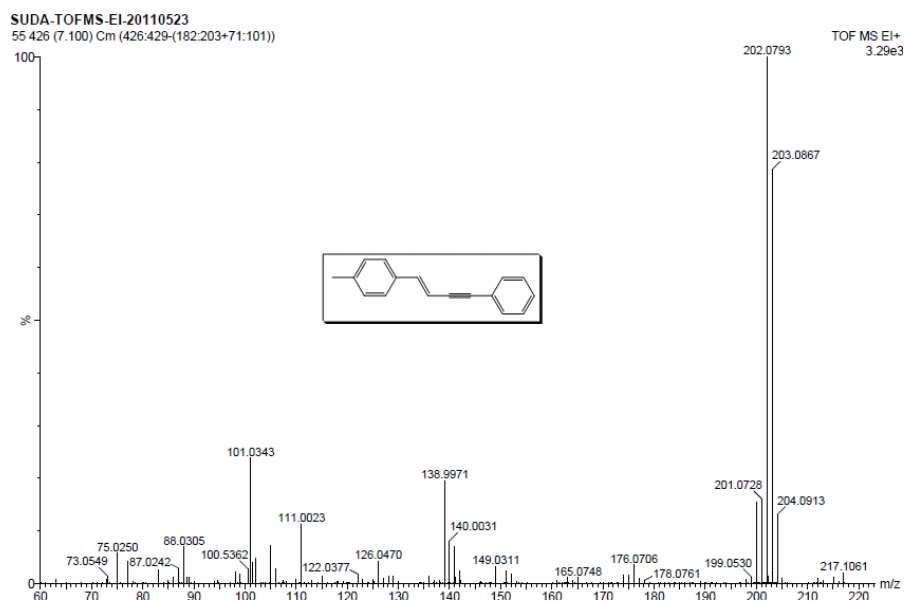

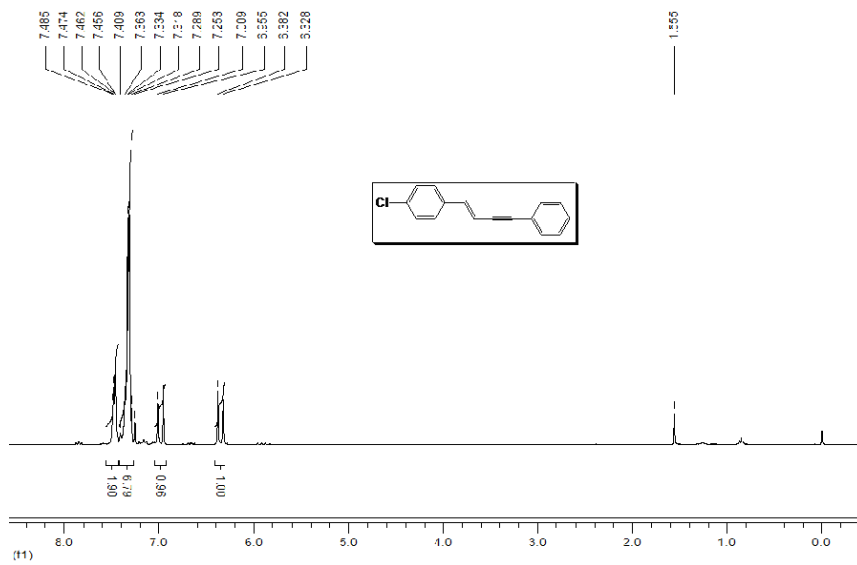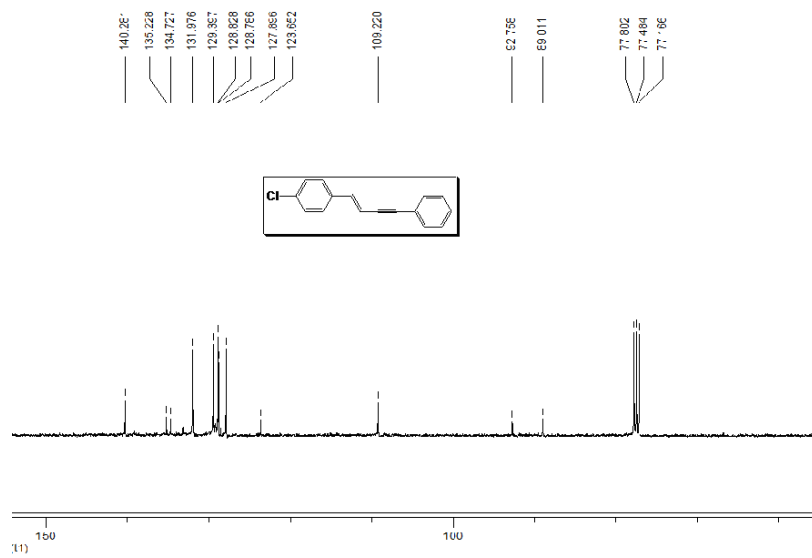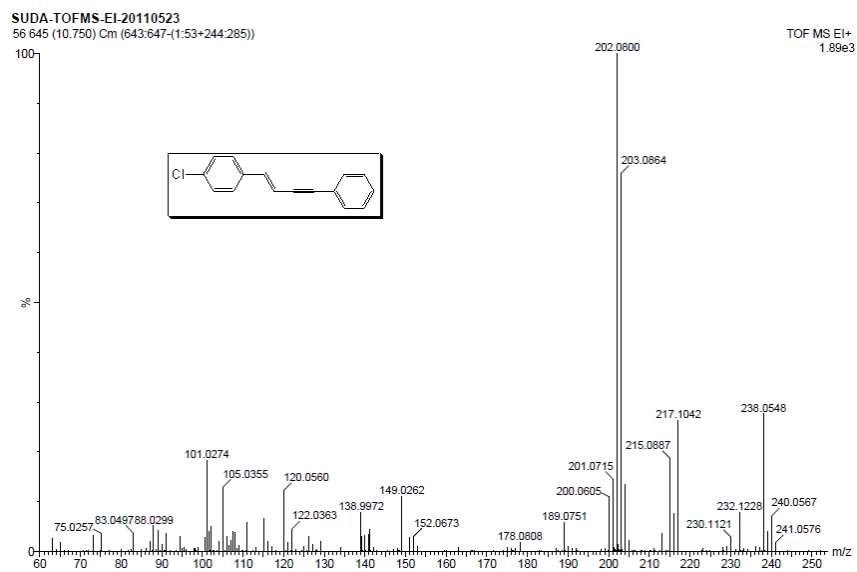

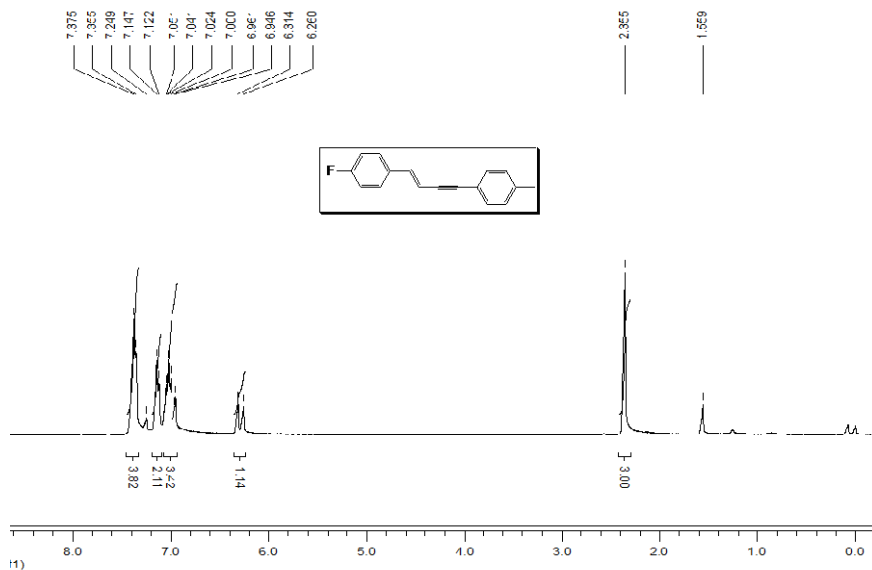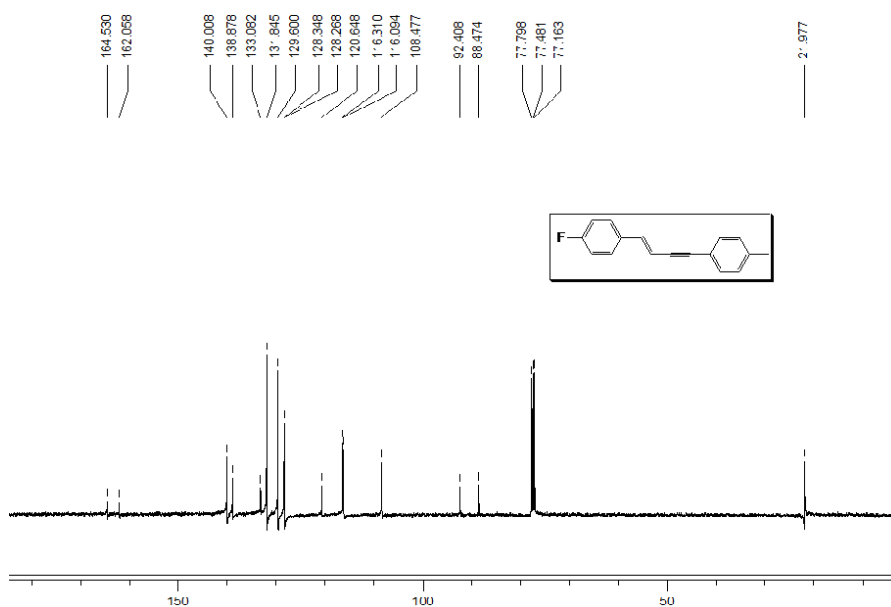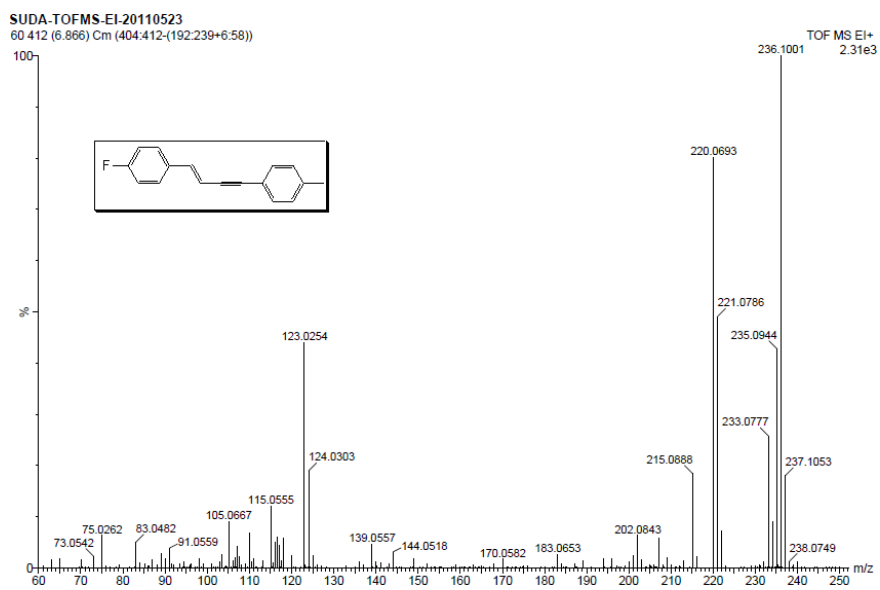

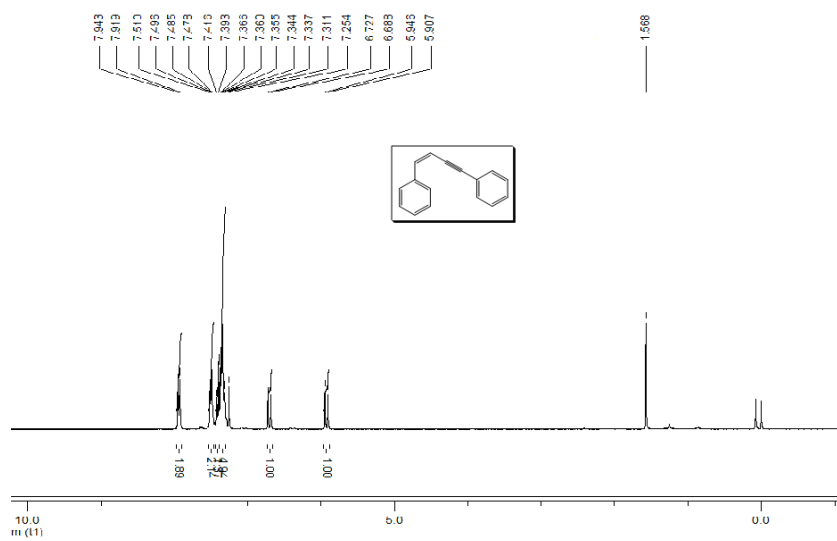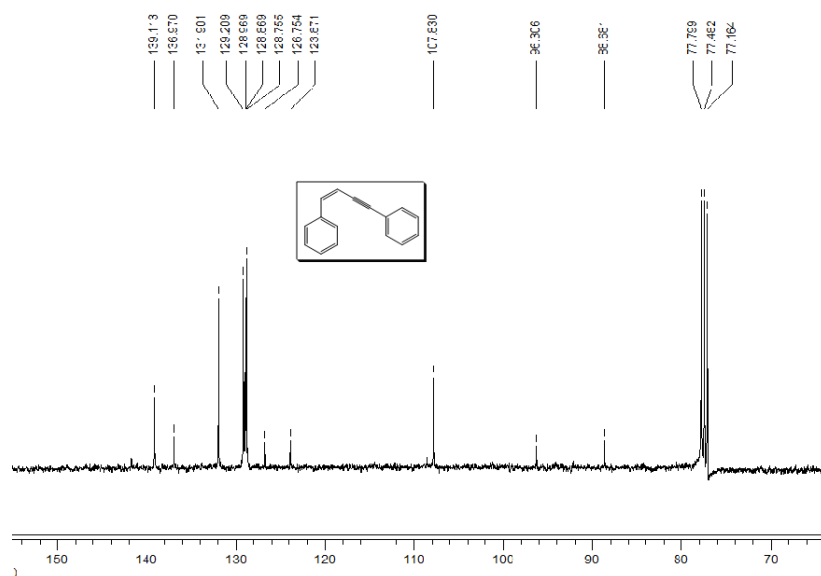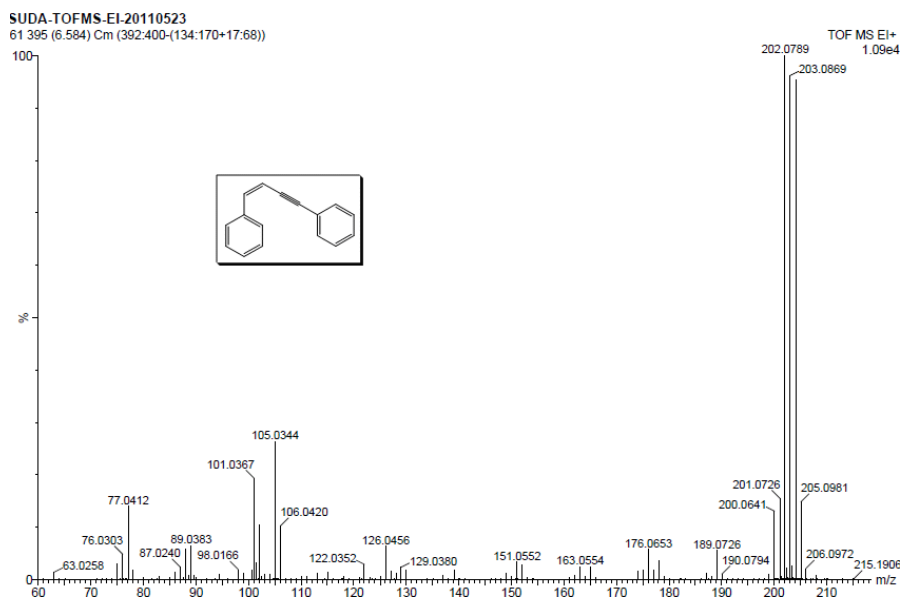



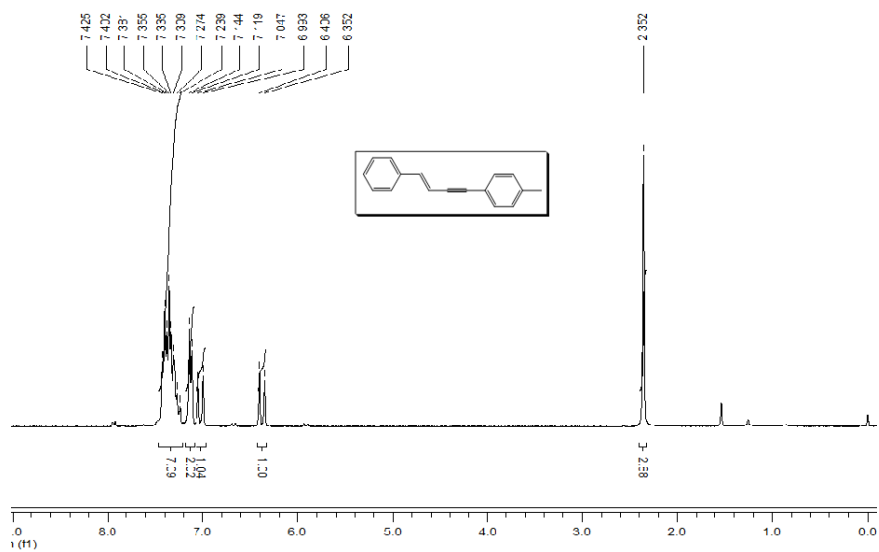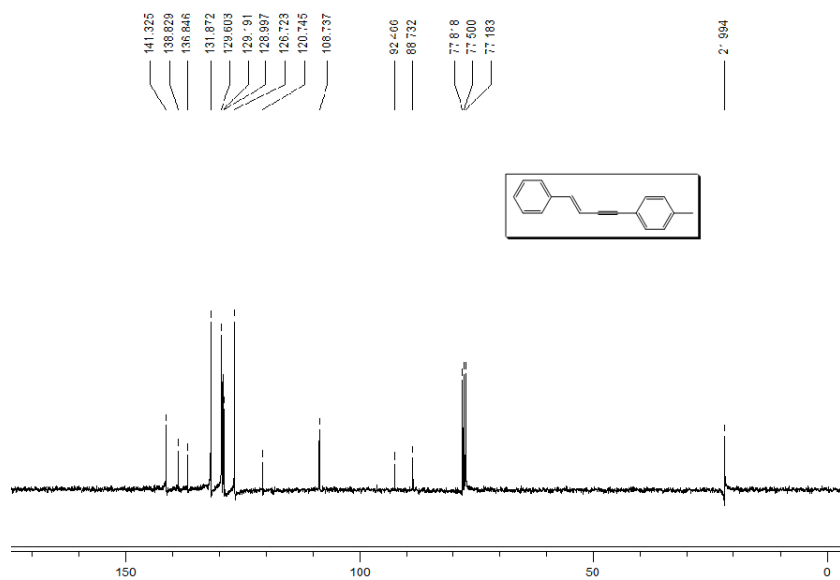

SUDA-TOFMS-EI-20110523  
 64 513 (8.550) Cm (507:513-(408:415+367:374))

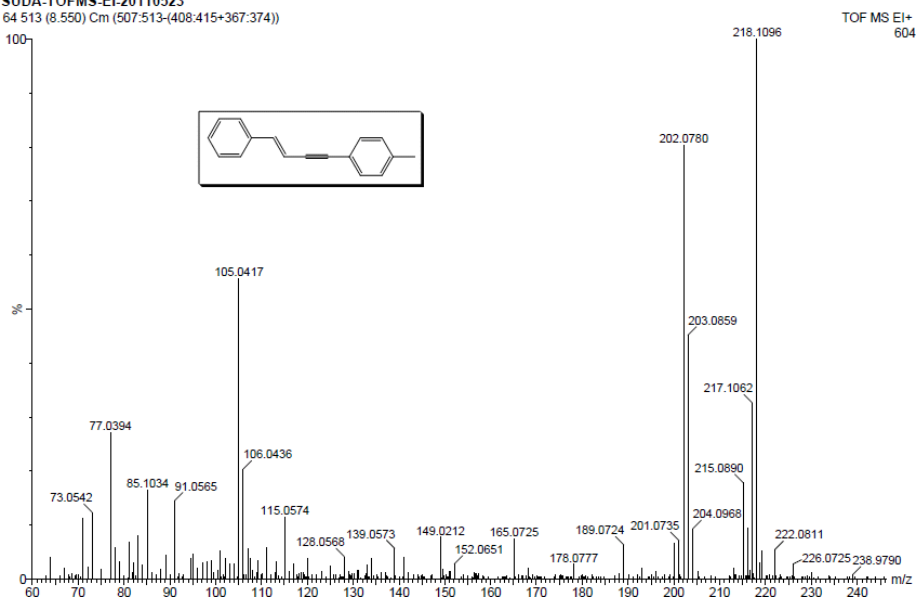

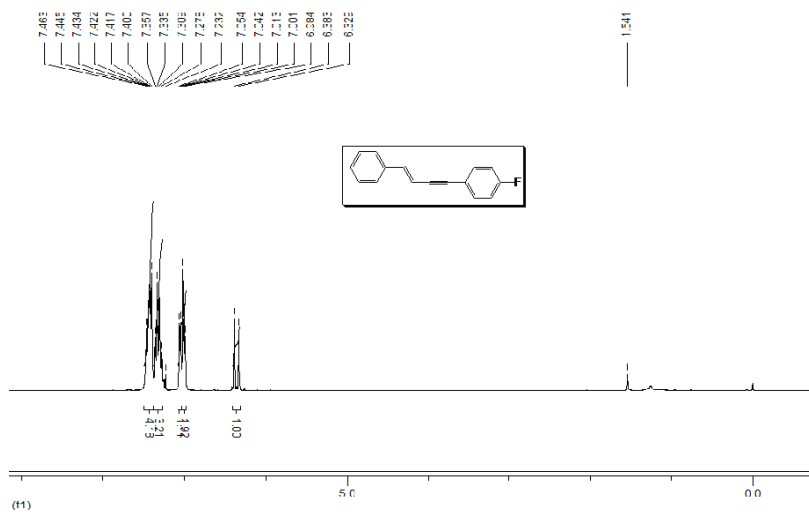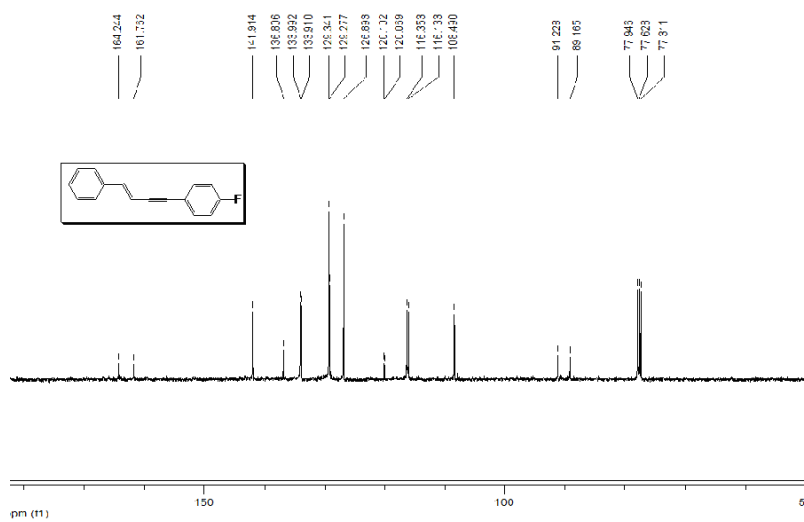

SUDA-TOFMS-EI-20110523  
 65.587 (9.784) Cm (586:588-(298:385+18:135))

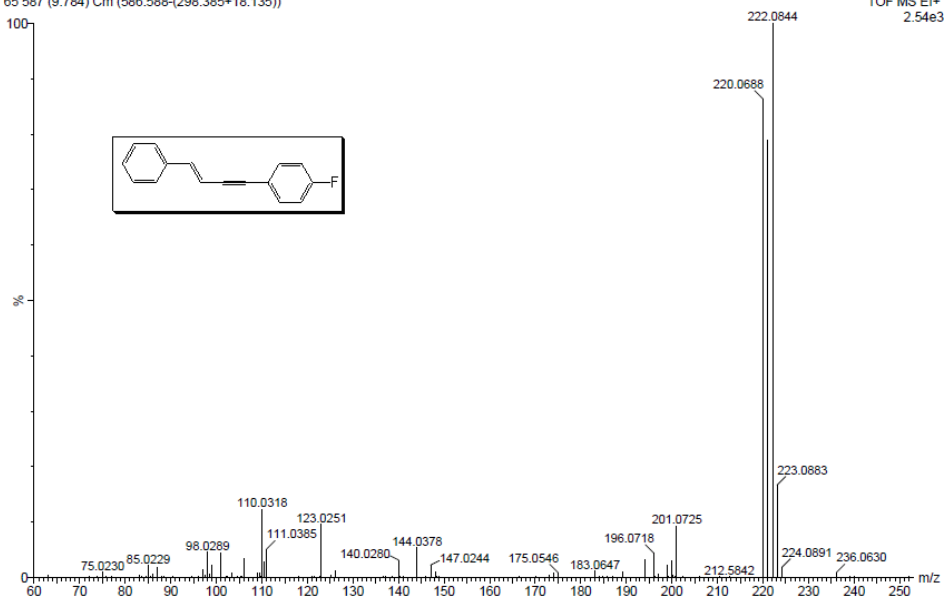

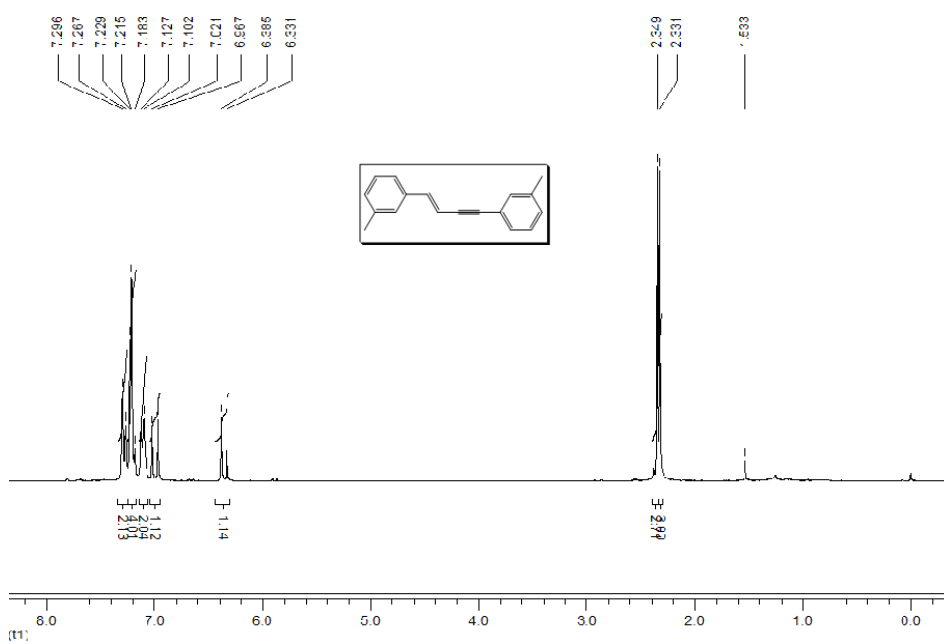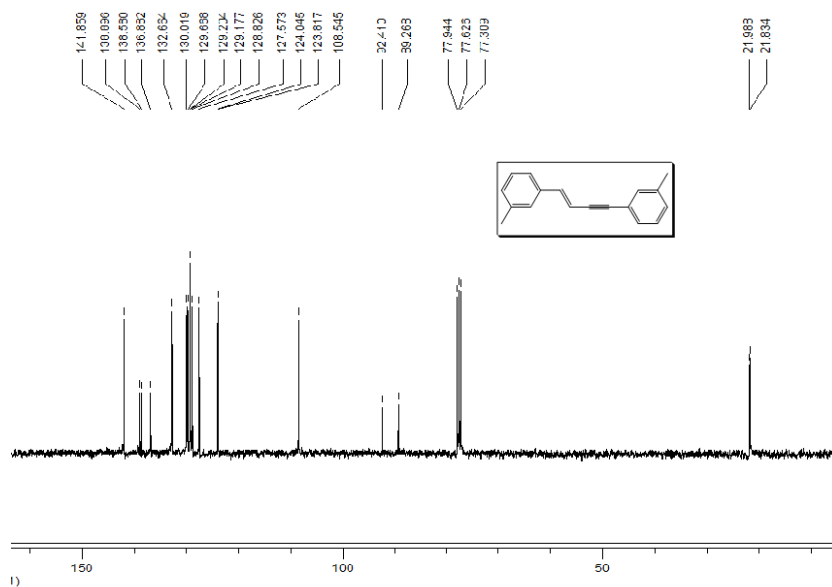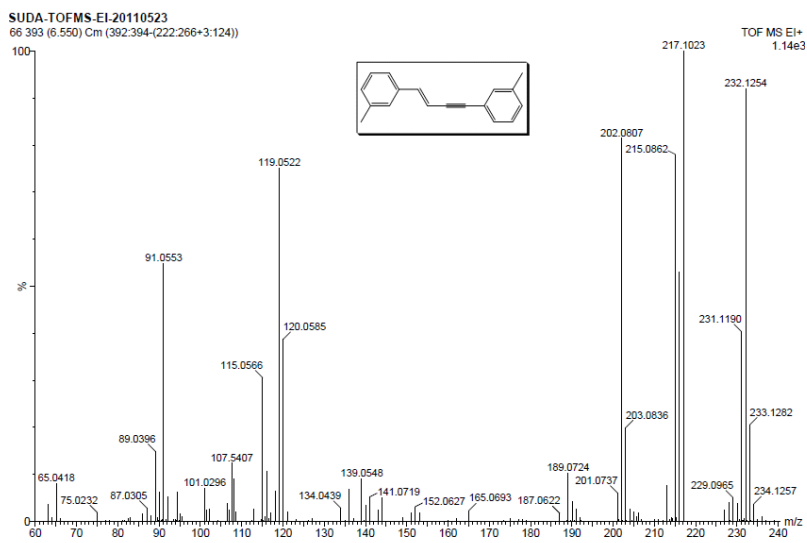

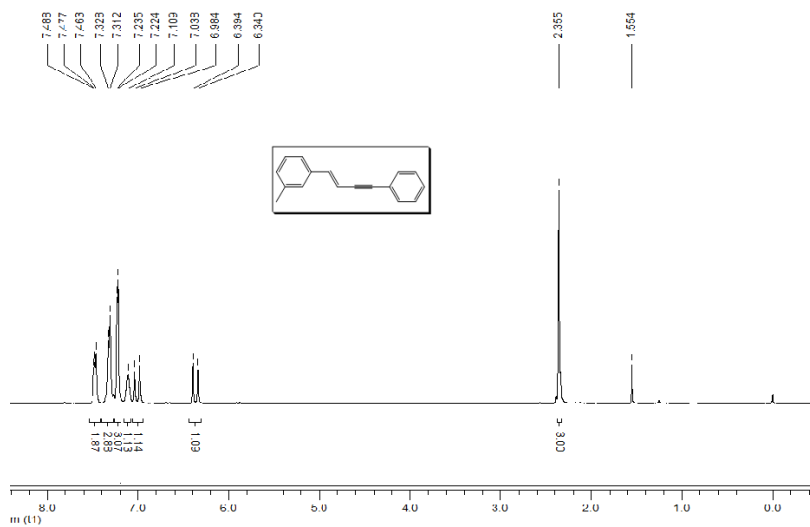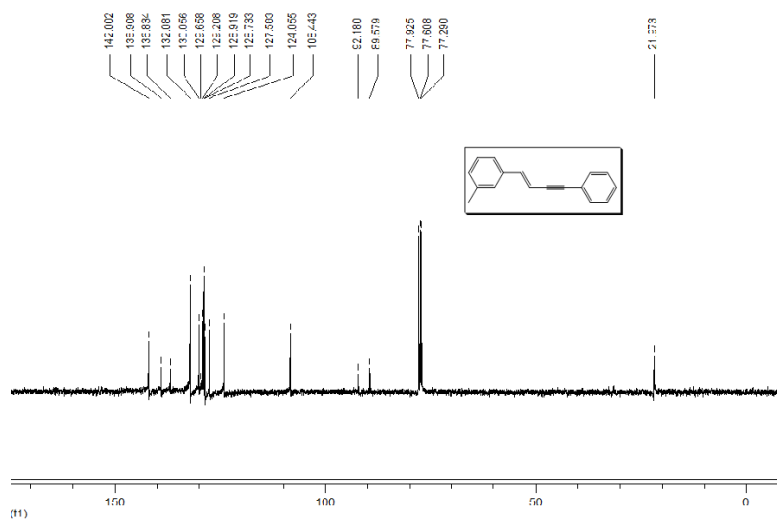

**SUDA-TOFMS-EI-20110523**  
67 380 (6.333) Cm (380:381-(268:273+224:227))

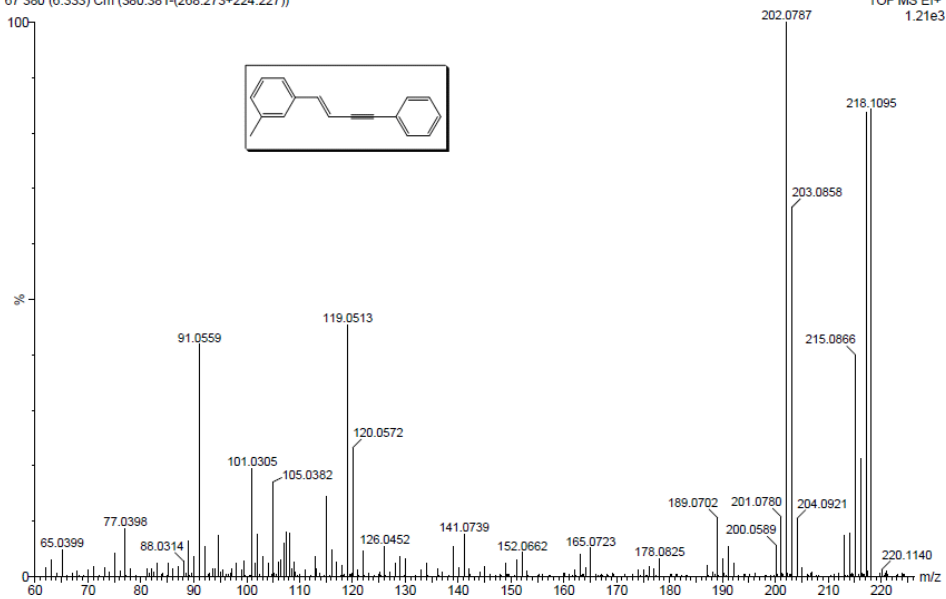

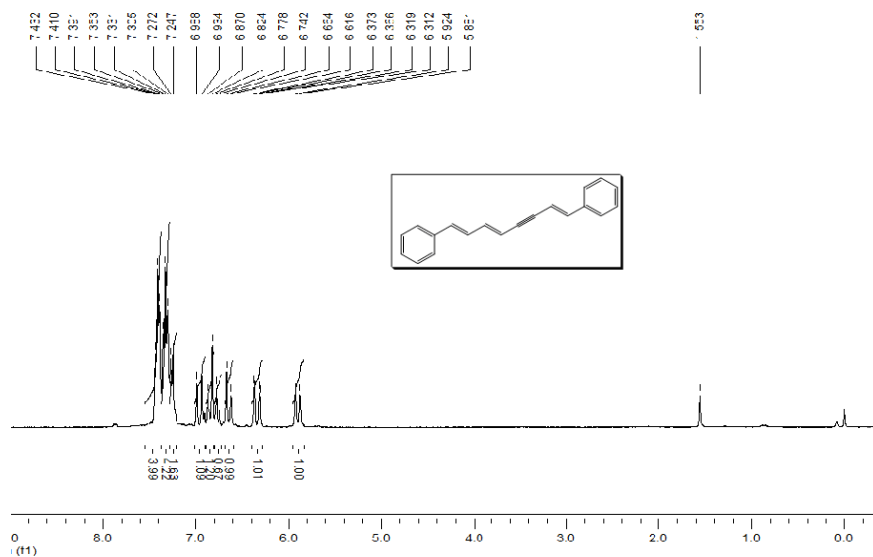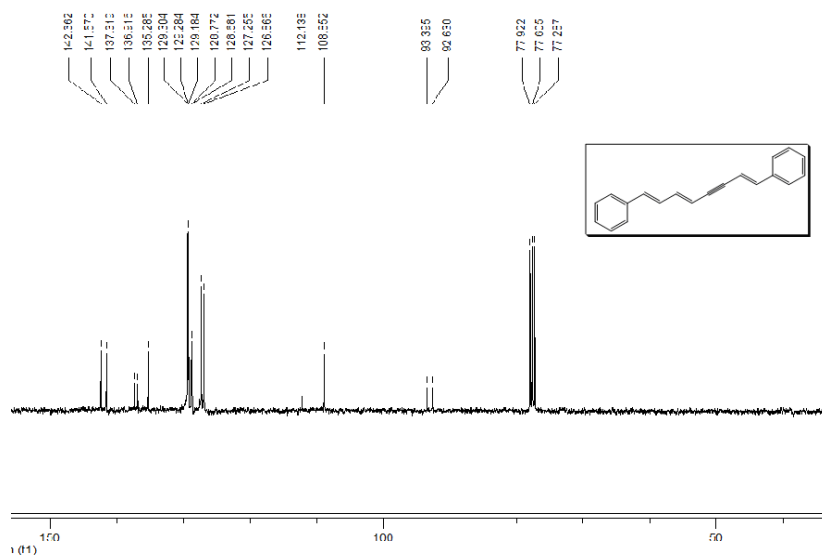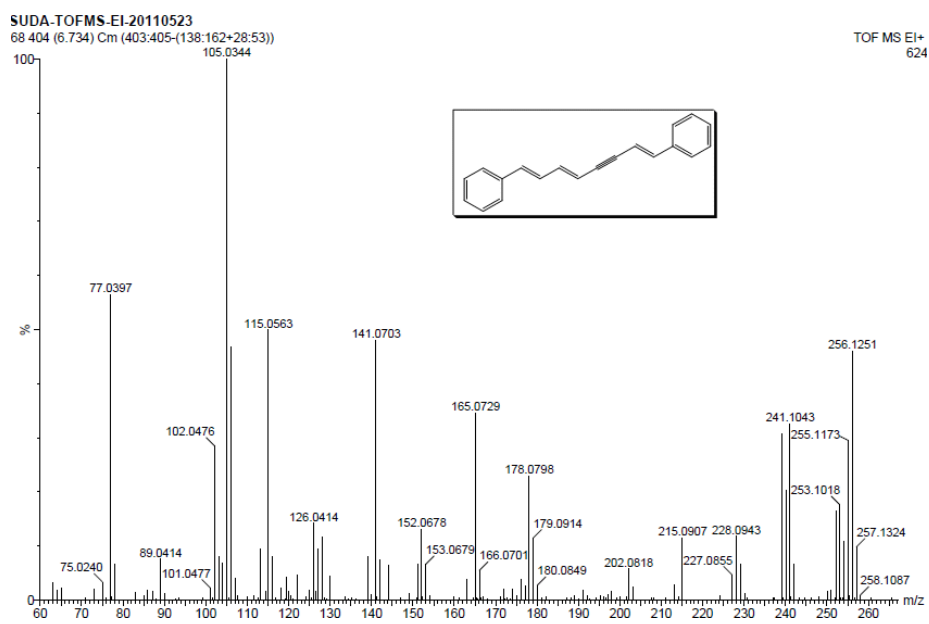

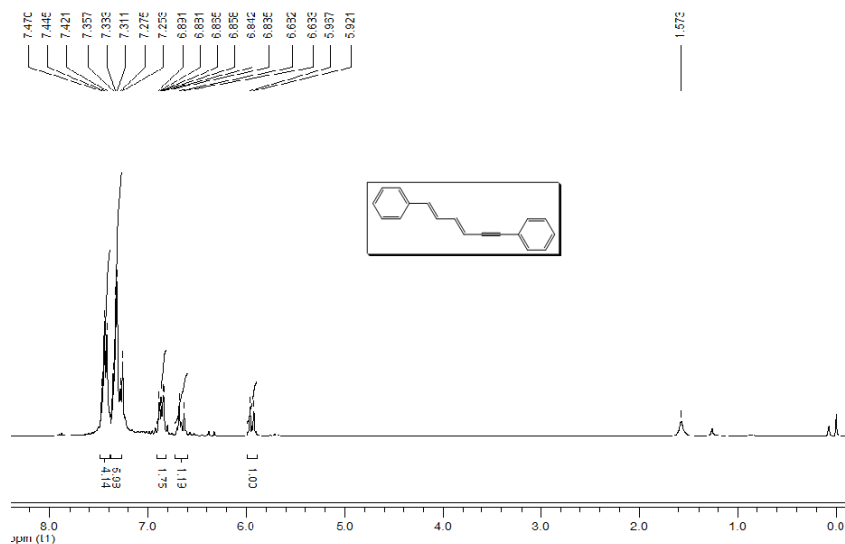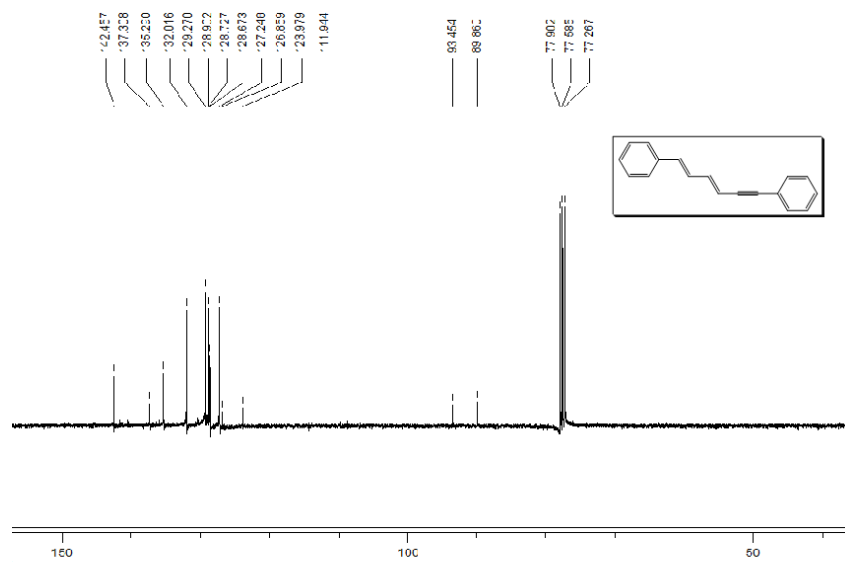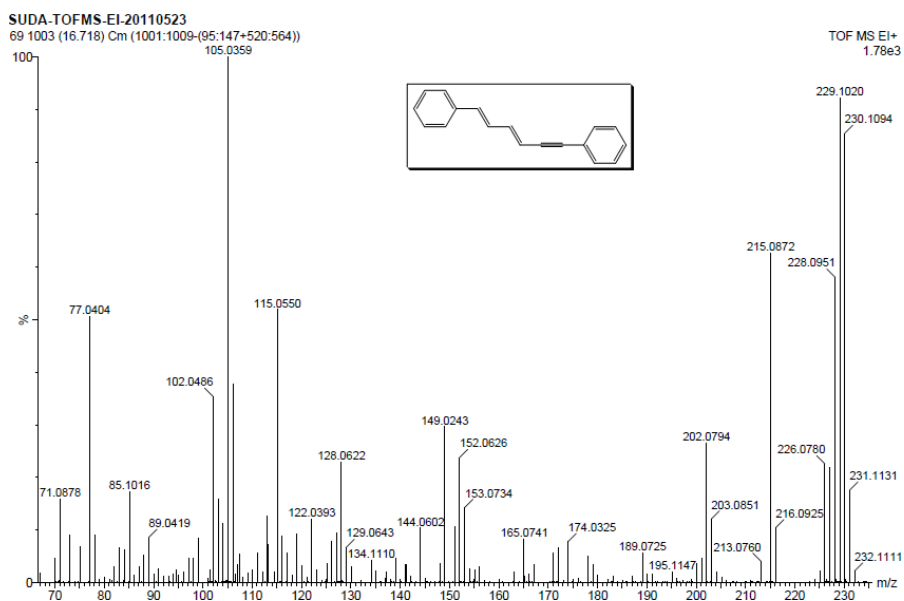

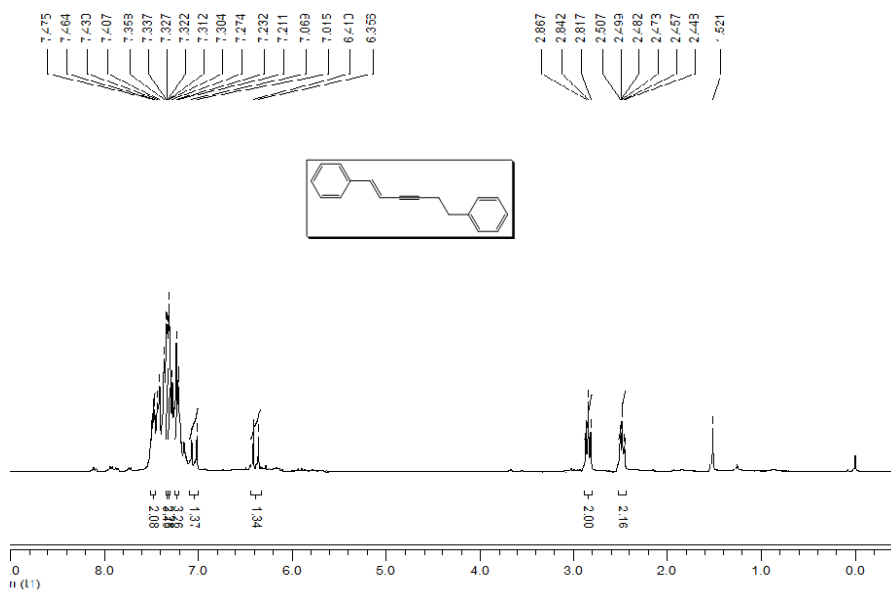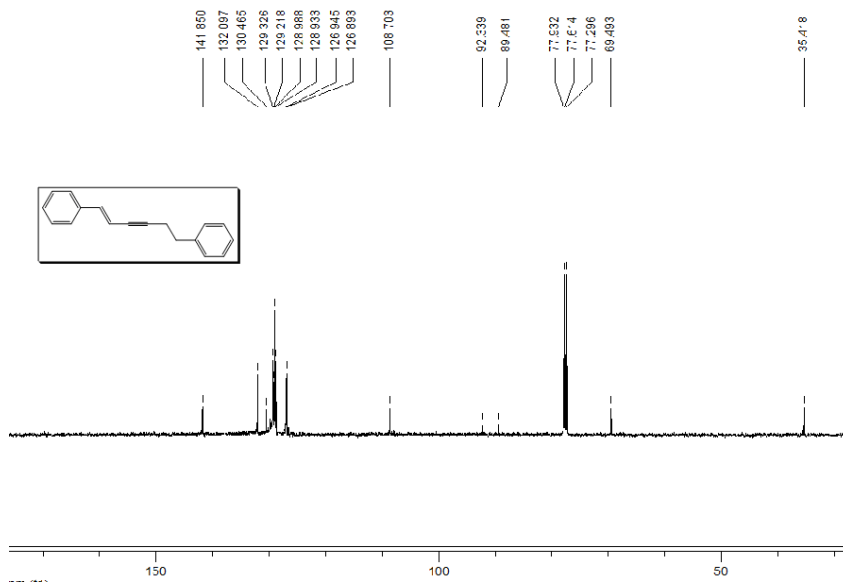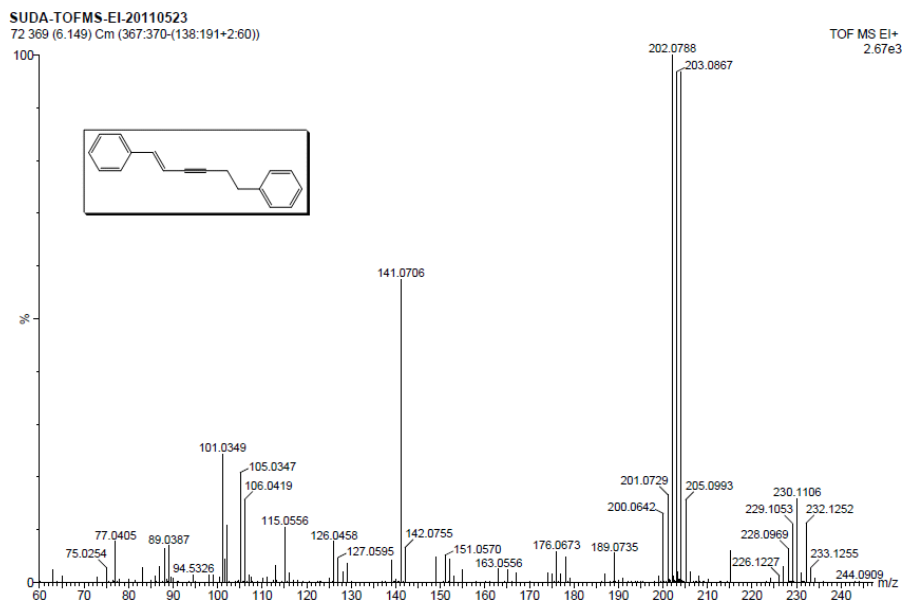

Supplement: c1ob06210g.pdf [file c1ob06210g.pdf]
